# Supplementary material
Source: publisher figshare collection journal article supplement (https://frontiersin.figshare.com/ndownloader/files/15321845)

**Supplementary Figure 5.** Principal component analysis (PCA) of the amino acid profile obtained by HPLC. The variance explained by each component (%) is indicated in parentheses.

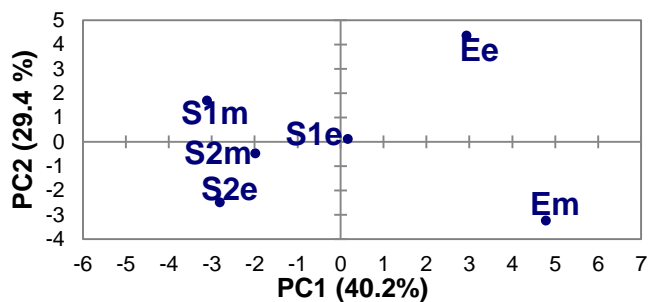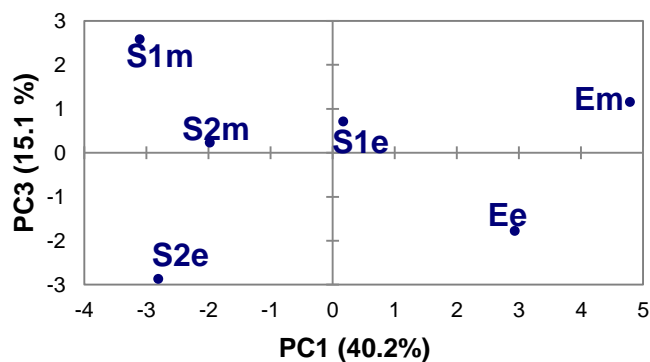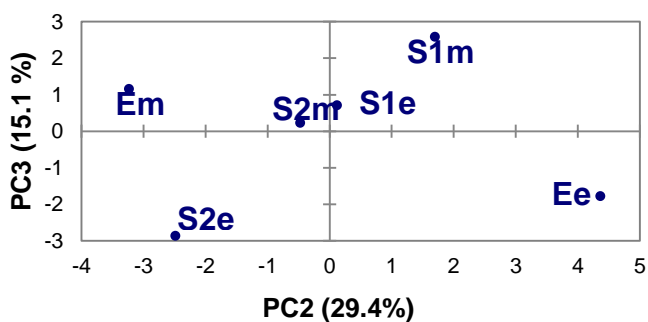

Supplement: Supplementary file [file 15321845]
